# Supplementary material
Source: PubMed Central journal article supplement (PMC11371464)
Supplement: NIHMS2007710-supplement-supplementary_material_1.pdf [file NIHMS2007710-supplement-supplementary_material_1.pdf]

## **SUPPLEMENTARY MATERIALS**

### **Role of Underlying Liver Pathology in the Development of Immune Related Hepatitis: a case control study**

#### **Authors**

Erica M. Storm<sup>1\*</sup>, Dimitrios Makrakis<sup>2</sup>, Genevieve I. Lin<sup>1</sup>, Rafee Talukder<sup>1</sup>, Dimitra R. Bakaloudi<sup>1</sup>, Eshana E. Shah<sup>3</sup>, Iris W. Liou<sup>1</sup>, David Hockenbery<sup>4</sup>, Petros Grivas<sup>1,4†</sup>, Ali Raza Khaki<sup>5†</sup>

#### **Author Affiliations:**

1. University of Washington, Seattle, WA, USA
2. Jacobi Medical Center, Albert Einstein College of Medicine, Bronx, NY, USA
3. University of Illinois-Chicago, Chicago, IL, USA
4. Fred Hutchinson Cancer Center, Seattle, WA, USA
5. Stanford University, Stanford, CA, USA

\*Corresponding author. Contact email: estorm15@uw.edu

†Equal contributions as co-senior authors

| <b>ICD-10 Code Category</b>                | <b>ICD-10 Codes</b>        | <b>irH<br/>n=103</b> | <b>Other<br/>n=622</b> |
|--------------------------------------------|----------------------------|----------------------|------------------------|
| Toxic Liver Disease                        | K71.1, K71.7, K71.8, K71.9 | 11                   | 2                      |
| Acute/Subacute Hepatic Failure             | K72.0                      | 8                    | 21                     |
| Hepatic failure                            | K72.9                      | 0                    | 73                     |
| Autoimmune Hepatitis                       | K75.4                      | 41                   | 0                      |
| Inflammatory Liver Disease,<br>Unspecified | K75.9                      | 15                   | 3                      |
| Fatty Liver                                | K76.0                      | 5                    | 56                     |
| Liver Congestion                           | K76.1                      | 0                    | 2                      |
| Portal Hypertension                        | K76.6                      | 2                    | 60                     |
| Hepatorenal Syndrome                       | K76.7                      | 0                    | 11                     |
| Hepatopulmonary Syndrome                   | K76.81                     | 0                    | 2                      |
| Other liver disease                        | K76.89, K76.9              | 52                   | 470                    |
| Biliary Pathology                          | K83.1, K83.8, K83.09       | 8                    | 51                     |
| Abnormal blood tests                       | R79.89, R94.5              | 48                   | 650                    |

**Supplementary Table 1** ICD-10 code attributions of patients identified for manual chart review. 725 patients had ICD-10 code associations and biochemical criteria to qualify for manual chart review during which 103 patients were found to have provider documented diagnoses of irH. ICD-10 codes of interest must have been assigned within 1 year of ICI initiation.

| Value                            | ALT              | AST              | AP               | Total Bilirubin | Albumin       |
|----------------------------------|------------------|------------------|------------------|-----------------|---------------|
| <b>No irH Baseline (n=194)</b>   | 19.0 [11.0-34.5] | 19.0 [14.0-38.0] | 79.0 [61.0-133]  | 0.5 [0.4-0.6]   | 3.8 [3.3-4.1] |
| <b>Cirrhosis (n=22)</b>          | 70.0 [39.0-75.0] | 79.5 [50.3-108]  | 127 [102-146]    | 1.3 [1.2-2.4]   | 3.5 [2.5-3.7] |
| <b>Liver Mets (n=33)</b>         | 23.0 [13.0-36.3] | 24 [20.0-41.8]   | 127 [27.3-167]   | 0.4 [0.3-0.6]   | 3.6 [3.1-3.9] |
| <b>Abnormal baseline (n=100)</b> | 35.0 [23.0-100]  | 38.0 [19.0-113]  | 134 [78.0-232]   | 0.4 [0.3-0.7]   | 3.6 [2.9-3.9] |
| <b>irH Baseline (n=97)</b>       | 18.0 [13.0-31.5] | 20.0 [17.0-26.5] | 69.0 [56.0-82.5] | 0.5 [0.4-0.7]   | 4.0 [3.7-4.3] |
| <b>Cirrhosis (n=5)</b>           | 44.0 [36.5-51.5] | 45 [28.0-63.0]   | 80.0 [69.3-107]  | 1.0 [0.6-1.6]   | 3.8 [3.5-4.0] |
| <b>Liver Mets (n=28)</b>         | 17.5 [11.0-26.8] | 19.5 [15.0-27.3] | 65.5 [46.8-81.0] | 0.5 [0.4-0.7]   | 3.9 [3.8-4.1] |
| <b>Abnormal baseline (n=26)</b>  | 26.0 [15.0-56.0] | 36.5 [22.0-53.3] | 78.5 [62.3-145]  | 0.5 [0.4-0.7]   | 3.6 [3.3-4.1] |
| <b>irH peak (n=97)</b>           | 222 [149-355]    | 164 [106-370]    | 148 [97.0-348]   | 0.9 [0.5-1.8]   | 3.4 [3.1-3.7] |
| <b>Cirrhosis (n=5)</b>           | 158 [149-198]    | 192 [88.0-194]   | 144 [103-174]    | 2.7 [0.6-3.8]   | 3.3 [2.8-3.4] |
| <b>Liver Mets (n=28)</b>         | 202 [135-306]    | 144 [106-228]    | 123 [64.0-264]   | 0.9 [0.6-1.4]   | 3.5 [3.3-3.8] |
| <b>Abnormal baseline (n=26)</b>  | 243 [150-556]    | 162 [104-416]    | 144 [108-223]    | 1.1 [0.6-3.4]   | 3.2 [2.8-3.7] |

**Supplementary Table 2** Liver biomarker profile in irH cases, controls and selected subpopulations. Median lab values were calculated and reported with interquartile range [IQ1-IQ3]. Presence of liver metastases was recorded at ICI initiation. Patients were considered to have abnormal baseline labs if any one value exceeded the upper or lower limit of normal (Table 1). For irH peak, maximum values are reported for all laboratory tests except albumin, for which the minimum value was recorded during irH course. Abbreviations: Aspartate transaminase (AST), alanine transaminase (ALT), Alkaline phosphatase (AP).
